# Supplementary material for: The Circular RNome of Developmental Retina in Mice
Source: PubMed Central journal article supplement — Mol Ther Nucleic Acids. 2019 Nov 26;19:339–49. doi: 10.1016/j.omtn.2019.11.016 (PMC6938940; doi:10.1016/j.omtn.2019.11.016), 2019-11-26
Supplement: mmc1.pdf [file mmc1.pdf]

**OMTN, Volume 19**

## **Supplemental Information**

### **The Circular RNome of Developmental Retina in Mice**

**Xue-Jiao Chen, Zi-Cheng Zhang, Xiao-Yun Wang, Heng-Qiang Zhao, Meng-Lan Li, Yue Ma, Yang-Yang Ji, Chang-Jun Zhang, Kun-Chao Wu, Lue Xiang, Lan-Fang Sun, Meng Zhou, and Zi-Bing Jin**

**Supplementary Figure 1. circRNA expression analysis at E18.5 vs. P1, P1 vs. P7, P7 vs. P14, P14 vs. P30.**

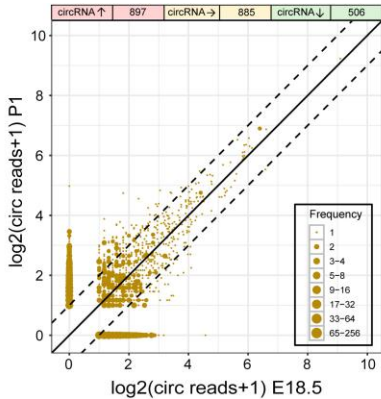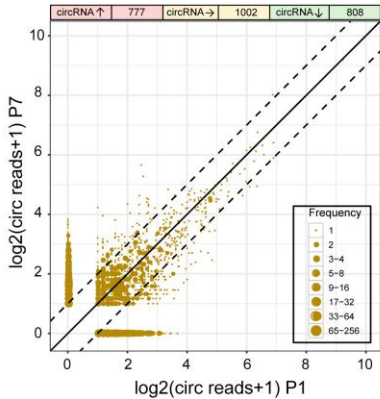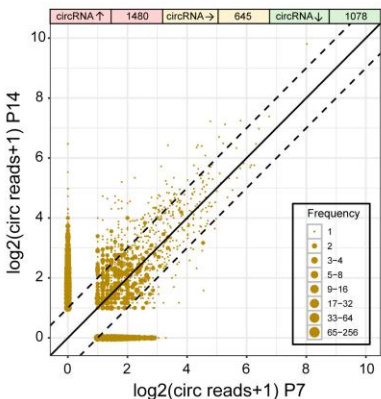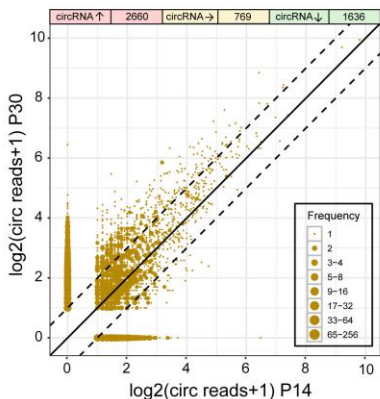

**Supplementary Figure 2. Head to tail junction sequences of circRNAs.**

mmu\_circ\_0001878 | Cdr1as    mmu\_circ\_0001757 | Bbs9    mmu\_circ\_0001468 | Hipk2    mmu\_circ\_0001692 | Arhgap10

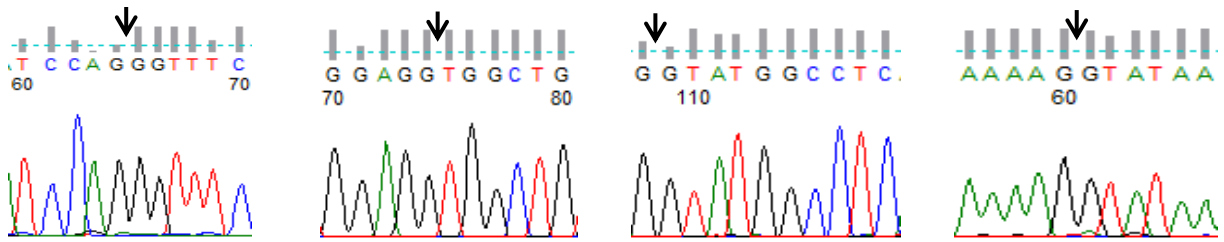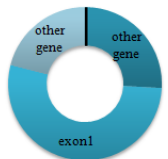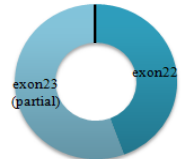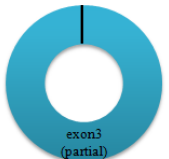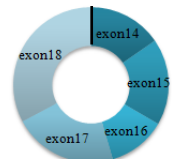

mmu\_circ\_0000377 | Arhgap5    mmu\_circ\_0001311 | Ankib1    mmu\_circ\_0000723 | Tulp4    mmu\_circ\_0001624 | Mettl9

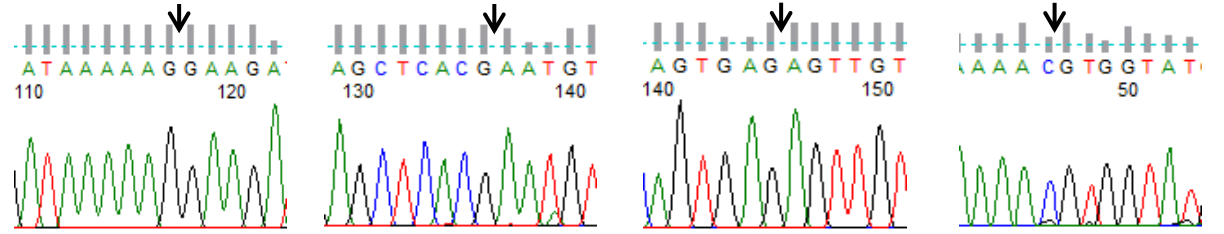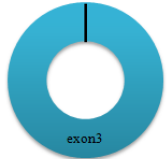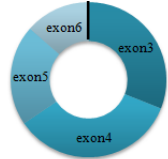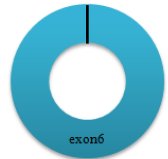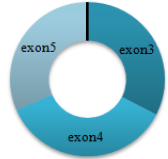

**Supplementary Figure 3. Comparison the results between RNA-seq and qRT-PCR.**

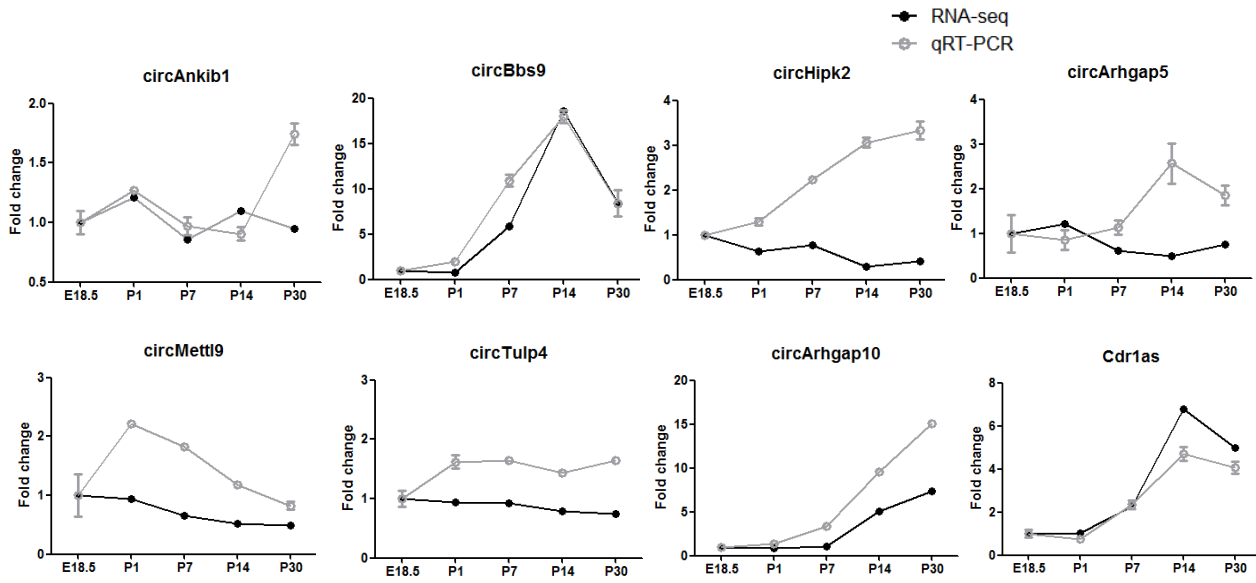

**Supplementary Figure 4. (A) circRNA expression change between P7 and P1 are positively correlated with host genes expression changes. (B) Summary of expression changes between circRNA and host gene at P7 vs. P1. (C) circRNA expression change between P14 and P1 are positively correlated with host genes expression changes. (D) Summary of expression changes between circRNA and host gene at P14 vs. P1.**

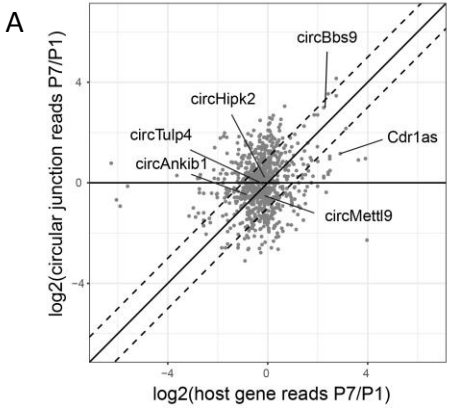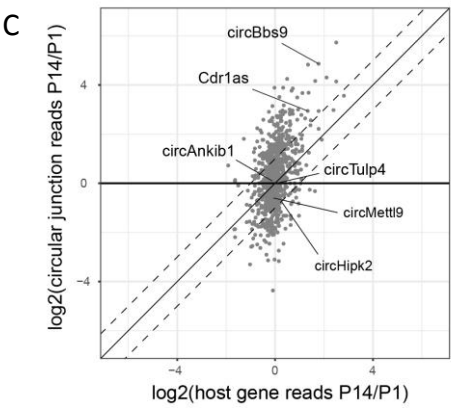

**B P7 vs. P1**

|           | mRNA ↑ | mRNA → | mRNA ↓ |
|-----------|--------|--------|--------|
| circRNA ↑ | 235    | 733    | 61     |
| circRNA → | 67     | 414    | 37     |
| circRNA ↓ | 113    | 705    | 153    |

**D P14 vs. P1**

|           | mRNA ↑ | mRNA → | mRNA ↓ |
|-----------|--------|--------|--------|
| circRNA ↑ | 115    | 833    | 17     |
| circRNA → | 7      | 451    | 8      |
| circRNA ↓ | 22     | 1442   | 295    |

**Supplementary Figure 5. luciferase assay detection the binding between miRNAs and circAnkib1 (A), circBbs9 (B) and circMettl9 (C) in 293D cell.**

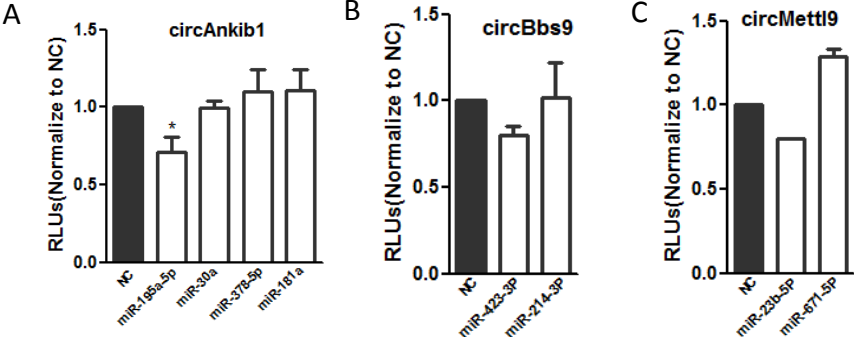

## Supplementary Figure 6. The target sites of miRNAs in corresponding circRNAs

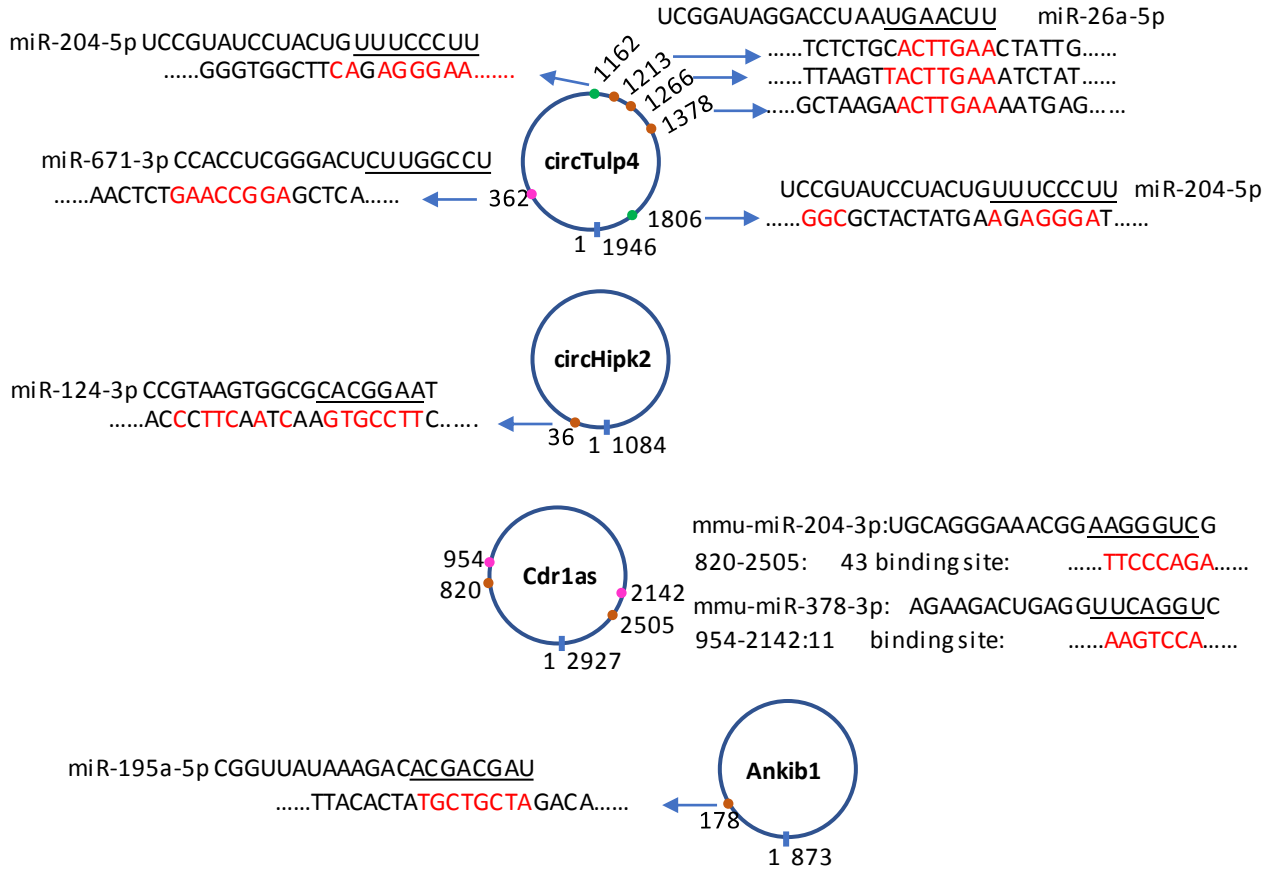

**Supplementary Figure 7. qRT-PCR identify the interference efficiency of si-circTulp4 in N2a cell.**

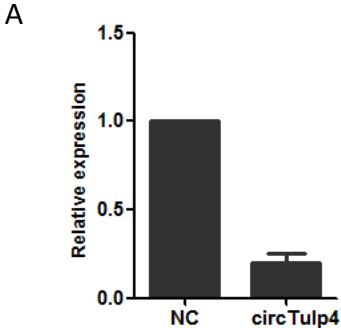



**Supplementary Figure 8. Representative ERG response recording of retina after AAV-circTulp4 shRNA and AAV-EGFP subretinal injection. Representative ERG curve that consisted of a negative a-wave and a positive b-wave; the distance between dashed lines labeled by a or b is the amplitude of the a and b wave, respectively.**

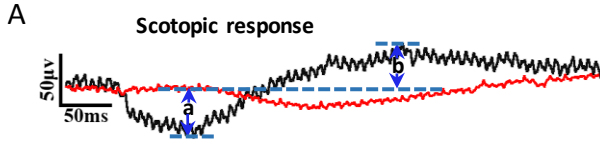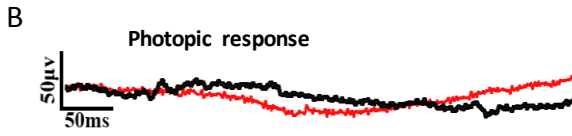

**Supplementary Figure 9. qRT-PCR detection of miR-204-5p, miR-26a-5p (a), miR-204-5p and miR-26a-5p target genes (b) and target s of Meis2 (C) in mouse retina after AAV-circTulp4 shRNA and AAV-EGFP subretinal injection.**

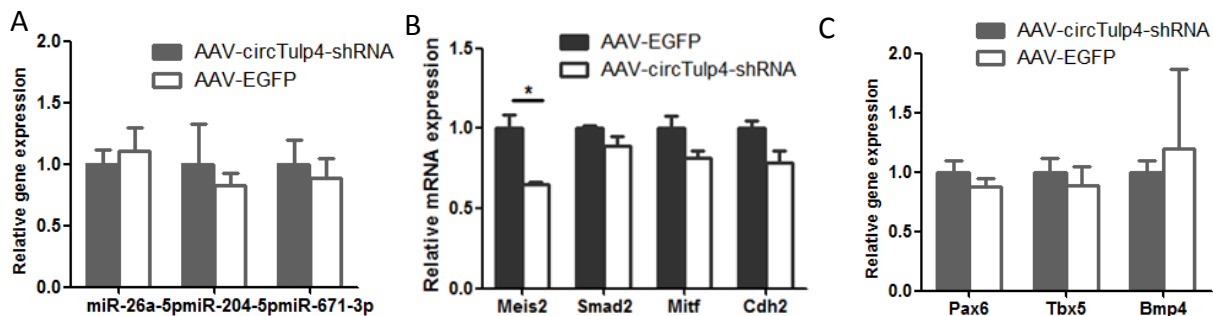

**Supplementary Figure 10. Negative control DAPB of ISH in mouse retina.**

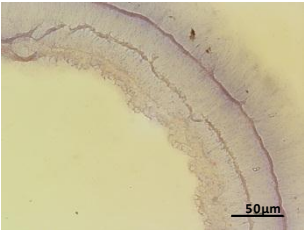

**20X**

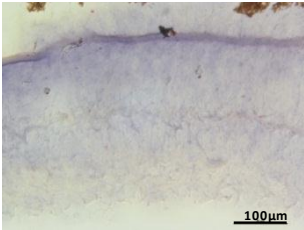

**40X**

**Supplementary Table 1. The replicates overlap of circRNAs across the five stages.**

|              | <b>E18.5</b> | <b>P1</b> | <b>P7</b> | <b>P14</b> | <b>P30</b> |
|--------------|--------------|-----------|-----------|------------|------------|
| <b>E18.5</b> | 301          | 736       | 647       | 705        | 802        |
| <b>P1</b>    | 736          | 452       | 813       | 862        | 983        |
| <b>P7</b>    | 647          | 813       | 384       | 929        | 1078       |
| <b>P14</b>   | 705          | 862       | 929       | 697        | 1543       |
| <b>P30</b>   | 802          | 983       | 1078      | 1543       | 2147       |

**Supplementary Table 2. Primers used in QPCR.**

|                  | Forward                  | Reverse                 |
|------------------|--------------------------|-------------------------|
| mmu_circ_0001624 | GGTCATCCTGGCATTGGT       | GCCAGCCAGATTTCTCAATG    |
| mmu_circ_0001468 | TATCCATGCTGACCTCAAACC    | CACACTACAGAAGGCACTTGA   |
| mmu_circ_0000723 | CCCAAGAGTGAG AAGGAGAAAC  | CGGTTAATTCAGGAGCCATCA   |
| mmu_circ_0001311 | CCGAAGAAATAGAAGCGGAGTAT  | GATGAGTGCTTTCGGAATTT    |
| mmu_circ_0001757 | TGGAGTAATGCTAATGAGTTGAGG | GCTGAGACTTCAGGCATGG     |
| mmu_circ_0000629 | GGGTCCATGAGGGTTGTATT     | CGAGGGCTGAACTCTTCTATG   |
| mmu_circ_0000377 | AGACATCGTGGAAGTGAAGAAG   | GGGTCGAGGCTCTTGTTT      |
| mmu_circ_0001878 | CGCAGTGTCTCCAGTGTATC     | TGCAGTTGCTGGAAGACC      |
| lin-Mettl9       | GAAAACGTAGGTGGCAAGTGG    | AGCTTCGACGACAAAGCCGGC   |
| lin-Bbs9         | ACCTGCAGTGCTCGTATC       | GGGTACCTTGCAACTTTACATC  |
| lin-Tulp4        | TCGTCTCTGTTCTACCTCTC     | CAAAGTCTCGCATGTTGTTGG   |
| lin-Ankib1       | AGCACTTTCGATCTCCCAGAG    | TGCAGAGCGACTGGCAGGGCT   |
| lin-Arhgap5      | TGACAGCAGACAACCTATCCATC  | CCACAGTGTTGCGAGTTCTA    |
| lin-Hipk2        | GGTCATTGACTTTGGTTC       | CTTCACACTACAGAAGGC      |
| Q-m-Mitf         | CCTCTGAAGAGCAGCAGTTCT    | CTCCCTGCGCTCCTGCTCCTG   |
| Q-m-Meis2        | GCAATCTATGGGCACCCGTTG    | GGAACAGACGTCTCCGCCGGC   |
| Q-m-Stat3        | CAGTTTCTGCAGAGCAGGTAT    | CTGGGCTGCCGTGGCTGCCGT   |
| Q-m-Smad2        | ACCATACCAAGGTCTCTTGAT    | ATGATGACTGTGAAGGTCCGG   |
| Q-m-Ulk2         | GGTTCTCCAAGATCTGCAGTA    | TCTTCGTCTCCTGTCTGCAC    |
| Q-m-Rd3          | GCCATCCTCAGGTTCCAGGCAG   | GGTTCGGATGTCACTGGCAAA   |
| Q-m-Pde4d        | CGGAGCAAAAGTGCCTCTGAG    | ACTTGAGTCTGCAGATGTGAC   |
| Q-m-Bbs9         | GGGAACGGCCACGATAAAATC    | ATCTTCAGCCTGAGGCCACC    |
| Q-m-Rnf217       | AGCTCTCAGGTACAACCTGGC    | CTTGATAGAGTCTCATGGGT    |
| Q-m-Slc6a6       | AATGGTGGAGGTGCGTTCCTC    | ACAGATCTTCTCCCAGCAGGT   |
| Q-m-GAPDH        | AGGTCGGTGTGAACGGATTTG    | TGTAGACCATGTAGTTGAGGTCA |

### Supplementary Table 3. siRNA target sequence.

|              | sequence              |
|--------------|-----------------------|
| si-circTulp4 | ACAACAGTGAGAGTTGTAA   |
| si-nc        | CGCTGAGTACTTCGAAATGTC |

### Supplementary Table 4. The concentration and quality of RNA used for RNA-seq. RNAs were extracted with the TRIzol reagent and RNeasy mini kit (Qiagen).

| Sample  | Concentration (ng/g) | OD (260/280) | Quality (RIN) | Sample | Concentration (ng/g) | OD (260/280) | Quality (RIN) |
|---------|----------------------|--------------|---------------|--------|----------------------|--------------|---------------|
| E18.5-1 | 21.3                 | 1.94         | 9.7           | P7-2   | 3.6                  | 1.94         | 10            |
| E18.5-3 | 3.39                 | 1.97         | 10            | P14-1  | 4.48                 | 1.88         | 9             |
| P1-1    | 5.22                 | 1.93         | 10            | P14-3  | 3.41                 | 1.97         | 8.4           |
| P1-2    | 5.84                 | 1.95         | 10            | P30-2  | 3.3                  | 1.87         | 8.6           |
| P7-1    | 4.17                 | 1.88         | 9.6           | P30-3  | 3                    | 1.91         | 8.7           |

**Supplementary Table 5. Filtration and quality control of raw data. Raw reads/bases: reads/bases from original sequence, clean reads/bases: reads/bases from filtrated sequence, clean Q30: ratio of clean bases with quality score > 30 in total base.**

| Sample ID | raw reads | Clean reads | raw bases (Mb) | Clean bases (Mb) | clean Q30 |
|-----------|-----------|-------------|----------------|------------------|-----------|
| E18-5-1   | 75997539  | 75243933    | 22798          | 20775            | 97.24%    |
| E18-5-3   | 77546099  | 76967520    | 23262          | 21379            | 97.23%    |
| P1-1      | 77543283  | 76978763    | 23262          | 21384            | 97.45%    |
| P1-2      | 70357032  | 69759219    | 21106          | 19432            | 97.41%    |
| P14-1     | 68346318  | 67787248    | 20502          | 18721            | 97.22%    |
| P14-3     | 75127421  | 74552395    | 22538          | 20711            | 97.41%    |
| P30-2     | 77687557  | 77030376    | 23306          | 21548            | 97.37%    |
| P30-3     | 78367493  | 77531361    | 23510          | 21464            | 97.06%    |
| P7-1      | 80589244  | 79991846    | 24176          | 22100            | 97.44%    |
| P7-2      | 65589116  | 65124438    | 19676          | 18050            | 97.43%    |

**Supplementary Table 6. Primers for luciferase assay.**

|                      | Forward                       | Reverse                       |
|----------------------|-------------------------------|-------------------------------|
| Lucif-m-circ_0001878 | CTCGAGGGTTCCAGTGGTGCCAGTAC    | GCGGCCGCCAGAAAACCTGAATGTC     |
| Lucif-m-circ_0001468 | CTCGAGGTATGGCTCACATGTGC       | GCGGCCGCCGGTAGTATCTGGATTGC    |
| Lucif-m-circ_0000723 | GCGGCCGCAGTTGTAAGAGTCCATCCAGG | GTTTAAACCTCACTGTTGTGGCCTCGCAG |
| Lucif-m-circ_0001311 | CTCGAGAATGTGAAACATGTTGTA      | GCGGCCGCCGTGAGCTCGAAGCAGTG    |
| Lucif-m-circ_0001757 | CTCGAGGTGGCTGTACTIONCAATCCAG  | GCGGCCGCCTCCAGAGATGAGCTTGG    |
| Lucif-m-circ_0001624 | CTCGAGTGGTATGTGTGCAACAGAGAG   | GCGGCCGCCGTTTTCTACATAGGGAT    |
